# Supplementary material for: Telomere dysfunction in alveolar epithelial cells causes lung remodeling and fibrosis
Source: JCI journal article supplement (doi:10.1172/jci.insight.86704), 2016-09-07
Supplement: sd1 [file 1]

## Supplemental Figure S1

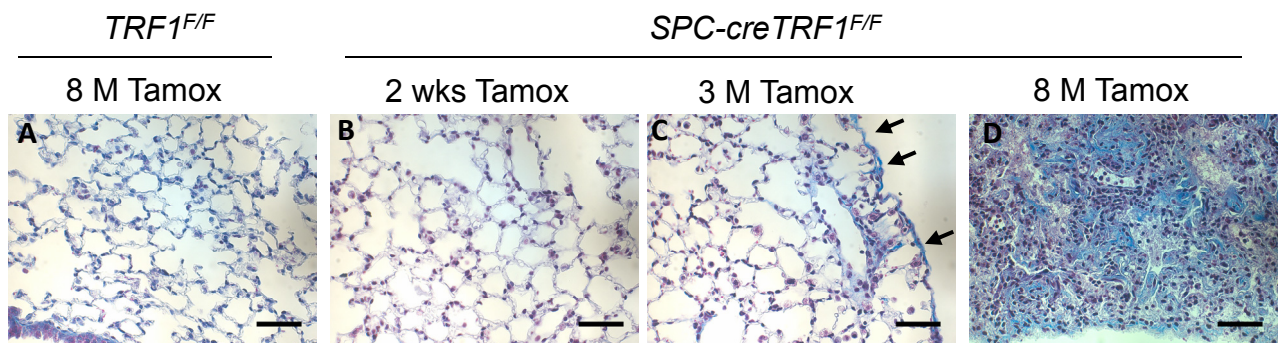

**Supplemental Figure S1. Masson's Trichrome staining on lung sections (A-D).**

Trichrome staining of lung sections from *SPC-creTRF1<sup>F/F</sup>* mice (2 weeks, 3 months and 8 months post tamoxifen administration) and *TRF1<sup>F/F</sup>* mice (8 months post tamoxifen). Magnification 40X. Scale bar 50um. Note the blue collagen fiber deposition in panel C marked by arrows and in panel D.

## Supplemental Figure S2

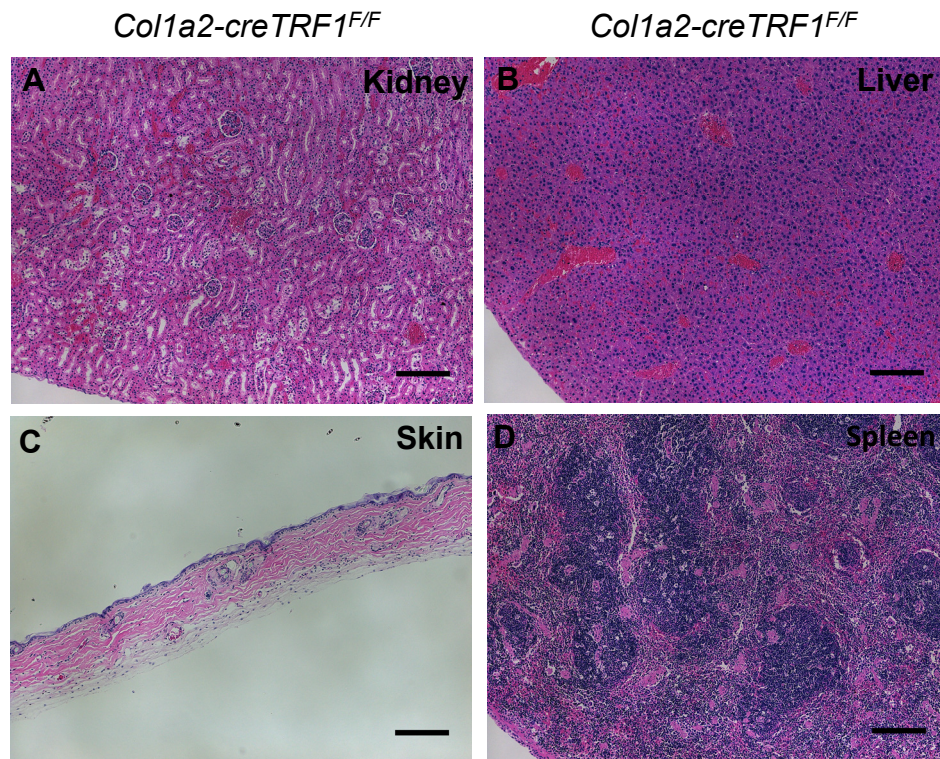

**Supplemental Figure S2. Telomere dysfunction in mesenchymal cells shows no evidence of pathology in kidney, liver, spleen and skin.** H&E staining of **(A)** Kidney **(B)** Liver **(C)** Skin and **(D)** Spleen sections from *Col1a2-creTRF1<sup>F/F</sup>* mice 48 hours after injection with tamoxifen (250 mg/kg body weight) show no pathologic abnormality. Magnification 10X. Scale bar 300um.

## Supplemental Figure S3

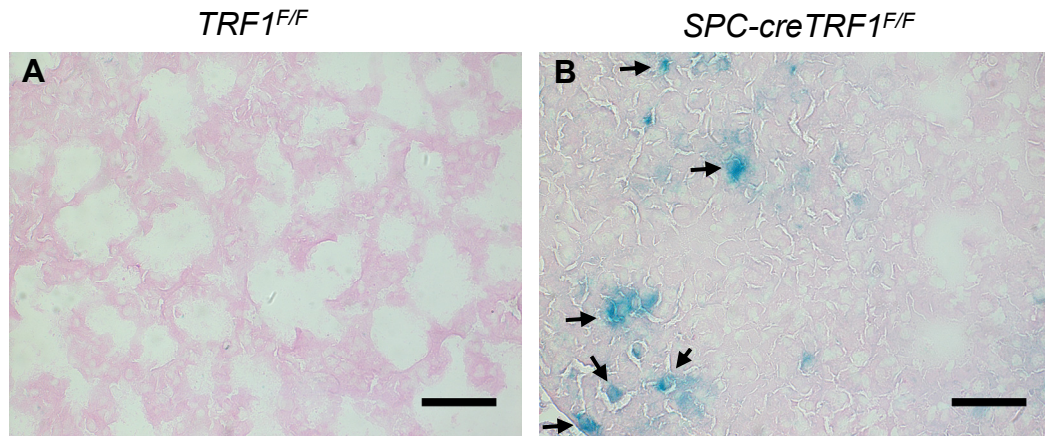

**Supplemental Figure S3. Cytochemical detection of SA-β-gal staining (A-B).** SA-β-gal staining of frozen lung sections from *SPC-creTRF1<sup>F/F</sup>* mice and *TRF1<sup>F/F</sup>* mice (8 months post tamoxifen). Magnification 40X. Scale bar 50 μm. Blue stained cells marked by black arrows are present in *SPC-creTRF1<sup>F/F</sup>* lungs and not *TRF1<sup>F/F</sup>* lungs.

Supplemental Table 1

| CD45<br>Positive<br>gate | Cell type                                | <i>TRF1<sup>F/F</sup></i> | <i>SPC-cre TRF1<sup>F/F</sup></i> |
|--------------------------|------------------------------------------|---------------------------|-----------------------------------|
|                          |                                          | Mean ± SEM                | Mean ± SEM                        |
|                          | CD45 positive (Leukocytes)               | 30.07±3.75                | 44.43±10.08                       |
|                          | CD3 positive (T-cells)                   | 4.34±0.72                 | 6.680±1.51                        |
|                          | CD16/32 positive (B-cells)               | 2.71±0.46                 | 4.36±0.88                         |
|                          | Collagen and CXCR4 positive (Fibrocytes) | 0.92±0.28                 | 1.06±0.43                         |
|                          | CD206 positive (Macrophages)             | 3.05±0.38                 | 3.98±0.29                         |
|                          | IL21R positive (Th-17 cells)             | 0.66±0.04                 | 0.90±0.15                         |

**Supplemental Table 1. Immunophenotyping of mouse lungs from *SPC-creTRF1<sup>F/F</sup>* mice and *TRF1<sup>F/F</sup>* mice by flow cytometry.** Whole lung cell suspension prepared as described in methods was analyzed by flow cytometry. Analysis was done on lungs from *SPC-creTRF1<sup>F/F</sup>* mice and *TRF1<sup>F/F</sup>* mice (8 months post tamoxifen administration). Data was quantified as percentage of total cells analyzed. N=3 mice per group. Data was not significantly different between the two groups. *t*-test.

Supplemental Table 2

|          | Cell type                      | <i>TRF1<sup>F/F</sup></i> | <i>Col1a2cre TRF1<sup>F/F</sup></i> |
|----------|--------------------------------|---------------------------|-------------------------------------|
|          |                                | Mean ± SEM                | Mean ± SEM                          |
| CD45 Neg | Collagen Positive cells        | 17.75 ± 3.550             | 13.47 ± 1.738                       |
| CD45 Pos | CD45 positive cells            | 34.89 ± 1.94              | 37.56 ± 5.08                        |
|          | CD3 positive (T-cells)         | 7.77 ± 1.3                | 7.6 ± 2.02                          |
|          | CD16/32 positive (B-cells)     | 2.55 ± 0.85               | 3.08 ± 0.09                         |
|          | Collagen positive (Fibrocytes) | 0.52 ± 0.25               | 0.55 ± 0.15                         |
|          | F4/80 positive (Macrophages)   | 5.97 ± 0.13               | 5.2 ± 0.54                          |

**Supplemental Table 2. Immunophenotyping of mouse lungs from *Col1a2-creTRF1<sup>F/F</sup>* mice and *TRF1<sup>F/F</sup>* mice by flow cytometry.** Whole lung cell suspension prepared as described in methods was analyzed by flow cytometry. Analysis was done on lungs from *Col1a2-creTRF1<sup>F/F</sup>* mice and *TRF1<sup>F/F</sup>* mice ( 48 hours post tamoxifen administration). Data was quantified as percentage of total cells analyzed. N=3 mice per group. Data was not significantly different between the two groups. *t*-test.
